# Supplementary material for: Higher-order split operator schemes for solving the Schrödinger equation in the time-dependent wave packet method: applications to triatomic reactive scattering calculations
Source: Royal Society of Chemistry journal article supplement (doi:10.1039/c1cp22790d), 2012-01-01
Supplement: c1cp22790d.pdf [file c1cp22790d.pdf]

## Higher-Order Split Operator Schemes for Solving the Schrödinger Equation in the Time-Dependent Wave Packet Method: Applications to Triatomic Reactive Scattering Calculations

Zhigang Sun, Weitao Yang and Donghui Zhang

The names of the propagators following are named according to its original theoretical orders, the number of stages and the classification in the paper work, such as the 4S5 propagator indicates a 4th-order propagator with 5 stages (one time step needs 5 times action of  $\hat{H}$  on the wave function), which has a symmetric form with respect to the central parameter and the 4A5a propagator has the same stage number as the 4S5 propagator but with different parameters and asymmetric form. The last label "a" in the name of 4A5a is used to distinguish the propagators which fall into same class and have same stage number.

Parameters for all the tested higher-order splitting operators in form of Eq.5 (the Class S, with symmetric form):

$$\mathbf{4S3} \quad \omega_1 = 2 + 2^{1/3} + 1/2^{1/3}, \omega_0 = 1 - 2\omega_1 \quad [1]$$

$$\mathbf{4S5} \quad \omega_1 = 1/(4 - 4^{1/3}), \omega_2 = \omega_1, \omega_0 = 1 - 4\omega_1 \quad [2]$$

$$\mathbf{4S7} \quad \omega_1 = 1/(6 - 6^{1/3}), \omega_2 = \omega_1, \omega_3 = \omega_1, \omega_0 = 1 - 6\omega_1 \quad [2]$$

$$\mathbf{4S9} \quad \omega_1 = 1/(8 - 8^{1/3}), \omega_2 = \omega_1, \omega_3 = \omega_1, \omega_4 = \omega_1, \omega_0 = 1 - 8\omega_1 \quad [2]$$

$$\mathbf{4S11} \quad \omega_1 = 1/(10 - 10^{1/3}), \omega_2 = \omega_1, \omega_3 = \omega_1, \omega_4 = \omega_1, \omega_5 = \omega_1, \omega_0 = 1 - 10\omega_1 \quad [2]$$

$$\mathbf{6S7} \quad \omega_3 = 0.78451361047755726381949763, \omega_2 = 0.23557321335935813368479318, \\ \omega_1 = -1.17767998417887100694641568, \omega_0 = 1 - 2(\omega_3 + \omega_2 + \omega_1), \text{Ref.}[1, 3]$$

$$\mathbf{6S9a} \quad \omega_4 = 0.39216144400731413927925056, \omega_3 = 0.33259913678935943859974864, \\ \omega_2 = -0.70624617255763935980996482, \omega_1 = 0.08221359629355080023149045, \\ \omega_0 = 1 - 2(\omega_4 + \omega_3 + \omega_2 + \omega_1), \text{Ref.}[3, 4]$$

$$\mathbf{6S9b} \quad Y_1 = 1/(2 - 2^{1/5}), Y_0 = -2^{1/5}/(2 - 2^{1/5}), X_1 = 1/(2 - 2^{1/3}), X_0 = -2^{1/3}/(2 - 2^{1/3}), \\ \omega_4 = Y_1 * X_1, \omega_3 = Y_1 * X_0, \omega_2 = Y_1 * X_1, \omega_1 = Y_0 * X_1, \omega_0 = Y_0 * X_0, [2]$$

$$\mathbf{6S11a} \quad \omega_5 = 0.1705768865009222157, \quad \omega_4 = \omega_5, \quad \omega_3 = \omega_5, \quad \omega_2 = \omega_5, \quad \omega_1 = -0.423366140892658048, \quad \omega_0 = 1 - 2(\omega_5 + \omega_4 + \omega_3 + \omega_2 + \omega_1), \quad \text{Ref.}[5]$$

$$\mathbf{6S11b} \quad \omega_5 = 0.21375583945878254555518066964857, \\ \omega_4 = 0.18329381407425713911385974425217, \\ \omega_3 = 0.17692819473098943794898811709929, \\ \omega_2 = -0.44329082681170215849622829626258, \\ \omega_1 = 0.11728560432865935385403585669136, \\ \omega_0 = 1 - 2(\omega_5 + \omega_4 + \omega_3 + \omega_2 + \omega_1), \quad \text{Ref.}[6]$$

$$\mathbf{6S13} \quad \omega_6 = 0.13861930854051695245808013042625, \\ \omega_5 = 0.13346562851074760407046858832209, \\ \omega_4 = 0.13070531011449225190542755785015, \\ \omega_3 = 0.12961893756907034772505366537091, \\ \omega_2 = -0.35000324893920896516170830911323, \\ \omega_1 = 0.11805530653002387170273438954049, \\ \omega_0 = 1 - 2(\omega_6 + \omega_5 + \omega_4 + \omega_3 + \omega_2 + \omega_1), \quad \text{Ref.}[6]$$

$$\mathbf{6S15} \quad Y_1 = 1/(4 - 4^{1/5}), \quad Y_0 = -4^{1/5}/(4 - 4^{1/5}), \quad X_1 = 1/(2 - 2^{1/3}), \quad X_0 = -2^{1/3}/(2 - 2^{1/3}), \\ \omega_7 = Y_1 * X_1, \quad \omega_6 = Y_1 * X_0, \quad \omega_5 = Y_1 * X_1, \quad \omega_4 = Y_1 * X_1, \quad \omega_3 = Y_1 * X_0, \\ \omega_2 = Y_1 * X_1, \quad \omega_1 = Y_0 * X_1, \quad \omega_0 = Y_0 * X_0, \quad \text{Ref.} [2]$$

$$\mathbf{8S15a} \quad \omega_7 = 0.629030650210433, \quad \omega_6 = 0.1369349464166871, \\ \omega_5 = -1.06458714789183, \quad \omega_4 = 1.66335809963315, \quad \omega_3 = -1.67896928259640, \\ \omega_2 = -1.55946803821447, \quad \omega_1 = 0.311790812418427, \quad \omega_0 = 1 - 2(\omega_7 + \omega_6 + \omega_5 + \omega_4 + \omega_3 + \omega_2 + \omega_1), \quad \text{Ref.}[7]$$

$$\mathbf{8S15b} \quad \omega_7 = 0.74167036435061295344822780, \\ \omega_6 = -0.40910082580003159399730010, \quad \omega_5 = 0.19075471029623837995387626, \\ \omega_4 = -0.57386247111608226665638773, \quad \omega_3 = 0.29906418130365592384446354, \\ \omega_2 = 0.33462491824529818378495798, \quad \omega_1 = 0.31529309239676659663205666, \\ \omega_0 = 1 - 2(\omega_7 + \omega_6 + \omega_5 + \omega_4 + \omega_3 + \omega_2 + \omega_1) \quad \text{Ref.}[3, 8]$$

$$\mathbf{8S17} \quad \omega_8 = 0.13020248308889008087881763, \\ \omega_7 = 0.56116298177510838456196441, \quad \omega_6 = -0.38947496264484728640807860,$$

$$\begin{aligned}\omega_5 &= 0.15884190655515560089621075, \omega_4 = -0.39590389413323757733623154, \\ \omega_3 &= 0.18453964097831570709183254, \omega_2 = 0.25837438768632204729397911, \\ \omega_1 &= 0.29501172360931029887096624, \omega_0 = 1 - 2(\omega_8 + \omega_7 + \omega_6 + \omega_5 + \omega_4 + \omega_3 + \\ &\omega_2 + \omega_1) \text{ Ref.}[6]\end{aligned}$$

**8S19**  $\omega_9 = 0.10236997691919677217947233016768,$   
 $\omega_8 = 0.15193719542124150042122517519886,$   
 $\omega_7 = -0.25758500798800419714675345320434,$   
 $\omega_6 = 0.22207280907359627745287320824157,$   
 $\omega_5 = 0.14428079109272857169409977400023,$   
 $\omega_4 = 0.45902412791454253044738988194508,$   
 $\omega_3 = -0.35087981035009346255903840093339,$   
 $\omega_2 = 0.12632969388923674360157818562148,$   
 $\omega_1 = 0.14951143568721988602249080443402,$   
 $\omega_0 = 1 - 2(\omega_8 + \omega_7 + \omega_6 + \omega_5 + \omega_4 + \omega_3 + \omega_2 + \omega_1), \text{ Ref.}[3, 4]$

Parameters for all the tested higher-order splitting operators in form of Eq.6 (the Class A, with asymmetric form):

**4A4a**  $\alpha_1 = 1/2 - \frac{\sqrt{7/8}}{3}, \alpha_2 = -1/3 + \frac{\sqrt{7/8}}{3}, \alpha_3 = 1 - 2(\alpha_1 + \alpha_2), \alpha_4 = \alpha_2, \alpha_5 = \alpha_1;$   
 $\beta_1 = 1, \beta_2 = 1/2 - \beta_1 = -1/2, \beta_3 = \beta_2, \beta_4 = \beta_1 \text{ Ref.}[8]$

**4A4b**  $\alpha_1 = 0.1344961992774310892/2, \alpha_2 = -0.2248198030794208058, \alpha_3 =$   
 $0.7563200005156682911, \alpha_4 = 0.3340036032863214255, \alpha_5 = \alpha_1;$   
 $\beta_1 = 0.5153528374311229364, \beta_2 = -0.085782019412973646, \beta_3 =$   
 $0.4415830236164665242, \beta_4 = 0.1288461583653841854 \text{ Ref.}[9]$

**4A5a**  $\alpha_1 = \frac{14-\sqrt{19}}{108}, \alpha_2 = \frac{20-7\sqrt{19}}{108}, \alpha_3 = 1/2 - (\alpha_1 + \alpha_2), \alpha_4 = \alpha_3, \alpha_5 = \alpha_2, \alpha_6 = \alpha_1;$   
 $\beta_1 = 2/5, \beta_2 = -1/10, \beta_3 = 1 - 2(\beta_1 + \beta_2) = 2/5, \beta_4 = \beta_2, \beta_5 = \beta_1 \text{ Ref.}[3, 8]$

**4A5b**  $\alpha_1 = 0.81186273854451628884, \alpha_2 = -0.67748039953216912289, \alpha_3 = 1/2 -$   
 $(\alpha_1 + \alpha_2), \alpha_4 = \alpha_3, \alpha_5 = \alpha_2, \alpha_6 = \alpha_1; \beta_1 = -0.00758691311877447385,$   
 $\beta_2 = 0.31721827797316981388, \beta_3 = 1 - 2(\beta_1 + \beta_2) = 2/5, \beta_4 = \beta_2, \beta_5 = \beta_1$   
 $\text{ Ref.}[10]$

**4S6a**  $\alpha_1 = 0.0792036964311957$ ,  $\alpha_2 = 0.353172906049774$ ,  
 $\alpha_3 = -0.0420650803577195$ ,  $\alpha_4 = 1 - 2(\alpha_1 + \alpha_2 + \alpha_3)$ ,  $\alpha_5 = \alpha_3$ ,  $\alpha_6 = \alpha_2$ ,  $\alpha_7 = \alpha_1$ ;  
 $\beta_1 = 0.209515106613362$ ,  $\beta_2 = -0.143851773179818$ ,  $\beta_3 = 1/2 - (\beta_1 + \beta_2)$ ,  
 $\beta_4 = \beta_3$ ,  $\beta_5 = \beta_2$ ,  $\beta_6 = \beta_1$  Ref.[11]

**4A6b**  $\alpha_1 = 0.0829844064174052$ ,  $\alpha_2 = 0.396309801498368$ ,  
 $\alpha_3 = -0.0390563049223486$ ,  $\alpha_4 = 1 - 2(\alpha_1 + \alpha_2 + \alpha_3)$ ,  $\alpha_5 = \alpha_3$ ,  $\alpha_6 = \alpha_2$ ,  $\alpha_7 =$   
 $\alpha_1$ ;  $\beta_1 = 0.245298957184271$ ,  $\beta_2 = 0.604872665711080$ ,  $\beta_3 = 1/2 - (\beta_1 + \beta_2)$ ,  
 $\beta_4 = \beta_3$ ,  $\beta_5 = \beta_2$ ,  $\beta_6 = \beta_1$  Ref.[11]

**6B6S**  $\alpha_1 = 0.15$ ,  $\alpha_2 = 0.3297455985640361$ ,  $\alpha_3 = -0.049363257050623707$ ,  
 $\alpha_4 = 1 - 2(\alpha_1 + \alpha_2 + \alpha_3)$ ,  $\alpha_5 = \alpha_3$ ,  $\alpha_6 = \alpha_2$ ,  $\alpha_7 = \alpha_1$ ;  $\beta_1 = 0.316$ ,  $\beta_2 =$   
 $0.4312992634164797$ ,  $\beta_3 = 1/2 - (\beta_1 + \beta_2)$ ,  $\beta_4 = \beta_3$ ,  $\beta_5 = \beta_2$ ,  $\beta_6 = \beta_1$  Ref.[5, 11]

**6A8**  $\alpha_1 = 0.06942944346252987735848865824703402$ ,  
 $\alpha_2 = -0.13315519831598209409961309951373512$ ,  
 $\alpha_3 = 0.00129038917981078974230481746443284$ ,  
 $\alpha_4 = 0.42243536567364142699881962380226825$ ,  
 $\alpha_5 = 1 - 2 * (\alpha_1 + \alpha_2 + \alpha_3 + \alpha_4)$ ,  
 $\alpha_6 = \alpha_4$ ,  $\alpha_7 = \alpha_3$ ,  $\alpha_8 = \alpha_2$ ,  $\alpha_9 = \alpha_1$ ;  
 $\beta_1 = 0.28487837717280084052745346456657828$ ,  
 $\beta_2 = 0.32783975759612945412054678367325547$ ,  
 $\beta_3 = -0.38122104271932629475622784374211274$ ,  
 $\beta_4 = 1/2 - (\beta_1 + \beta_2 + \beta_3)$ ,  
 $\beta_5 = \beta_4$ ,  $\beta_6 = \beta_3$ ,  $\beta_7 = \beta_2$ ,  $\beta_8 = \beta_1$ , Ref.[12]

**6A9**  $\alpha_1 = 0.09517625454177405267746114335519342$ ,  
 $\alpha_2 = -0.12795028552368677941219191621429411$ ,  
 $\alpha_3 = 0.10597295345325113143793587608716998$ ,  
 $\alpha_4 = 0.44822227660082748416851634186561201$ ,  
 $\alpha_5 = 1/2 - (\alpha_1 + \alpha_2 + \alpha_3 + \alpha_4)$ ,  
 $\alpha_6 = \alpha_5$ ,  $\alpha_7 = \alpha_4$ ,  $\alpha_8 = \alpha_3$ ,  $\alpha_9 = \alpha_2$ ,  $\alpha_{10} = \alpha_1$ ;  
 $\beta_1 = 0.66629689399770780134207498907168068$ ,  
 $\beta_2 = 0.02461890095210508713078430308713062$ ,

$$\beta_3 = -0.41072553361795113231992873918199025,$$

$$\beta_4 = 0.65772926205091317768935130009339042,$$

$$\beta_5 = 1 - 2 * (\beta_1 + \beta_2 + \beta_3 + \beta_4),$$

$$\beta_6 = \beta_4, \beta_7 = \beta_3, \beta_8 = \beta_2, \beta_9 = \beta_1, \text{ Ref. [12]}$$

**6A10**  $\alpha_1 = 0.0502627644003922, \alpha_2 = 0.413514300428344,$

$$\alpha_3 = 0.0450798897943977, \alpha_4 = -0.188054853819569,$$

$$\alpha_5 = 0.541960678450780, \alpha_6 = 1 - 2 * (\alpha_1 + \alpha_2 + \alpha_3 + \alpha_4 + \alpha_5), \alpha_7 = \alpha_5,$$

$$\alpha_8 = \alpha_4, \alpha_9 = \alpha_3, \alpha_{10} = \alpha_2, \alpha_{11} = \alpha_1; \beta_1 = 0.148816447901042,$$

$$\beta_2 = -0.132385865767784, \beta_3 = 0.067307604692185, \beta_4 = 0.432666402578175,$$

$$\beta_5 = 1/2 - (\beta_1 + \beta_2 + \beta_3 + \beta_4), \beta_6 = \beta_5, \beta_7 = \beta_4, \beta_8 = \beta_3, \beta_9 = \beta_2, \beta_{10} = \beta_1,$$

Ref. [11]

**6A11a**  $\alpha_1 = 0.0596950146437836379, \alpha_2 = 0.3494636851912376154,$

$$\alpha_3 = -0.0856561791358, \alpha_4 = 0.200634751125676724, \alpha_5 = 0.00535254, \alpha_6 =$$

$$1/2 - (\alpha_1 + \alpha_2 + \alpha_3 + \alpha_4 + \alpha_5), \alpha_7 = \alpha_6, \alpha_8 = \alpha_5, \alpha_9 = \alpha_4, \alpha_{10} = \alpha_3, \alpha_{11} = \alpha_2,$$

$$\alpha_{12} = \alpha_1; \beta_1 = 0.16992, \beta_2 = -0.0443007, \beta_3 = 0.2929282384129810594,$$

$$\beta_4 = -0.301519678268245944, \beta_5 = 0.1617903982773488197, \beta_6 = 1 - 2 * (\beta_1 +$$

$$\beta_2 + \beta_3 + \beta_4 + \beta_5), \beta_7 = \beta_5, \beta_8 = \beta_4, \beta_9 = \beta_3, \beta_{10} = \beta_2, \beta_{11} = \beta_1, \text{ Ref. [13]}$$

**6A11b**  $\alpha_1 = 0.0414649985182624, \alpha_2 = 0.198128671918067,$

$$\alpha_3 = -0.0400061921041533, \alpha_4 = 0.0752539843015807,$$

$$\alpha_5 = -0.0115113874206879, \alpha_6 = 1/2 - (\alpha_1 + \alpha_2 + \alpha_3 + \alpha_4 + \alpha_5), \alpha_7 = \alpha_6,$$

$$\alpha_8 = \alpha_5, \alpha_9 = \alpha_4, \alpha_{10} = \alpha_3, \alpha_{11} = \alpha_2, \alpha_{12} = \alpha_1; \beta_1 = 0.123229775946271, \beta_2 =$$

$$0.290553797799558, \beta_3 = -0.127049212625417, \beta_4 = -0.246331761062075,$$

$$\beta_5 = 0.357208872795928, \beta_6 = 1 - 2 * (\beta_1 + \beta_2 + \beta_3 + \beta_4 + \beta_5), \beta_7 = \beta_5,$$

$$\beta_8 = \beta_4, \beta_9 = \beta_3, \beta_{10} = \beta_2, \beta_{11} = \beta_1, \text{ Ref. [11]}$$

**6A11c**  $\alpha_1 = 0.0464874547908631308653061869817,$

$$\alpha_2 = -0.0606916711656429353091325494096,$$

$$\alpha_3 = 0.218466526463406810473052519699,$$

$$\alpha_4 = 0.168053579483092703041517425135,$$

$$\alpha_5 = 0.314392364170353486741817155744,$$

$$\alpha_6 = 1/2 - (\alpha_1 + \alpha_2 + \alpha_3 + \alpha_4 + \alpha_5),$$

$$\alpha_7 = \alpha_6, \alpha_8 = \alpha_5, \alpha_9 = \alpha_4, \alpha_{10} = \alpha_3, \alpha_{11} = \alpha_2, \alpha_{12} = \alpha_1;$$

$$\beta_1 = 0.184330483502665563472197717881,$$

$$\beta_2 = -0.0410569032977114623747767490040,$$

$$\beta_3 = 0.133755679666750330706128392342,$$

$$\beta_4 = 0.203764547132354738209957028584,$$

$$\beta_5 = -0.0117601669149600437224452179216,$$

$$\beta_6 = 1 - 2 * (\beta_1 + \beta_2 + \beta_3 + \beta_4 + \beta_5),$$

$$\beta_7 = \beta_5, \beta_8 = \beta_4, \beta_9 = \beta_3, \beta_{10} = \beta_2, \beta_{11} = \beta_1, \text{Ref.}[12]$$

$$\mathbf{6A14} \quad \alpha_1 = 0.0378593198406116, \alpha_2 = 0.102635633102435,$$

$$\alpha_3 = -0.0258678882665587, \alpha_4 = 0.314241403071447,$$

$$\alpha_5 = -0.130144459517415, \alpha_6 = 0.106417700369543,$$

$$\alpha_7 = -0.00879424312851058, \alpha_8 = 1 - 2 * (\alpha_1 + \alpha_2 + \alpha_3 + \alpha_4 + \alpha_5 + \alpha_6 + \alpha_7),$$

$$\alpha_9 = \alpha_7, \alpha_{10} = \alpha_6, \alpha_{11} = \alpha_5, \alpha_{12} = \alpha_4, \alpha_{13} = \alpha_3, \alpha_{14} = \alpha_2,$$

$$\alpha_{15} = \alpha_1; \beta_1 = 0.09171915262446165, \beta_2 = 0.183983170005006, \beta_3 =$$

$$-0.05653436583288827, \beta_4 = 0.004914688774712854, \beta_5 = 0.143761127168358,$$

$$\beta_6 = 0.328567693746804, \beta_7 = 1/2 - (\beta_1 + \beta_2 + \beta_3 + \beta_4 + \beta_5 + \beta_6), \beta_8 = \beta_7,$$

$$\beta_9 = \beta_6, \beta_{10} = \beta_5, \beta_{11} = \beta_4, \beta_{12} = \beta_3, \beta_{13} = \beta_2, \beta_{14} = \beta_1, \text{Ref.}[11]$$

$$\mathbf{8A17a} \quad \alpha_1 = 0.04020757626295627296653921454892367,$$

$$\alpha_2 = 0.17023759564885894706257453906663563,$$

$$\alpha_3 = 0.24370233998503432353195633486895307,$$

$$\alpha_4 = 0.56601963795366046019899599701939548,$$

$$\alpha_5 = -0.58169695762497039518529999797620005,$$

$$\alpha_6 = -0.24138639830477987453171482029238617,$$

$$\alpha_7 = 0.36115097569793127373014000321599616,$$

$$\alpha_8 = -0.53225450460377165284025446933453953,$$

$$\alpha_9 = 11/2 - (\alpha_1 + \alpha_2 + \alpha_3 + \alpha_4 + \alpha_5 + \alpha_6 + \alpha_7 + \alpha_8),$$

$$\alpha_{10} = \alpha_9, \alpha_{11} = \alpha_8, \alpha_{12} = \alpha_7, \alpha_{13} = \alpha_6, \alpha_{14} = \alpha_5, \alpha_{15} = \alpha_4,$$

$$\alpha_{16} = \alpha_3, \alpha_{17} = \alpha_2, \alpha_{18} = \alpha_1;$$

$$\beta_1 = 0.10968252140081995880852111452131455,$$

$$\beta_2 = 0.36756158806337006433149757369026277,$$

$$\begin{aligned}\beta_3 &= -0.04544131419758065661437375963088864, \\ \beta_4 &= 0.00022167162169864039643822185570309, \\ \beta_5 &= 0.05519927098092328759679762829526377, \\ \beta_6 &= -0.12513929981618023524050370745321727, \\ \beta_7 &= -0.04284389352937610255914308734324331, \\ \beta_8 &= -0.00393367299329157410510456094858013, \\ \beta_9 &= 1 - 2 * (\beta_1 + \beta_2 + \beta_3 + \beta_4 + \beta_5 + \beta_6 + \beta_7 + \beta_8), \\ \beta_{10} &= \beta_8, \beta_{11} = \beta_7, \beta_{12} = \beta_6, \beta_{13} = \beta_5, \beta_{14} = \beta_4, \beta_{15} = \beta_3, \beta_{16} = \beta_2, \\ \beta_{17} &= \beta_1, \text{Ref.}[12]\end{aligned}$$

**8A17b**

$$\begin{aligned}\alpha_1 &= 0.03676680389912337302666154929429291, \\ \alpha_2 &= 0.16040429374255560219395381214509780, \\ \alpha_3 &= -0.00472877643941287918639412436088645, \\ \alpha_4 &= 0.02983098489335056954884440558763334, \\ \alpha_5 &= 0.19135844311091097984885756175207225, \\ \alpha_6 &= -0.03781968145745128677723635761417376, \\ \alpha_7 &= 0.00351845996378093605518443870229385, \\ \alpha_8 &= 0.13067013867271618676514580608303276, \\ \alpha_9 &= 1/2 - (\alpha_1 + \alpha_2 + \alpha_3 + \alpha_4 + \alpha_5 + \alpha_6 + \alpha_7 + \alpha_8), \\ \alpha_{10} &= \alpha_9, \alpha_{11} = \alpha_8, \alpha_{12} = \alpha_7, \alpha_{13} = \alpha_6, \alpha_{14} = \alpha_5, \alpha_{15} = \alpha_4, \\ \alpha_{16} &= \alpha_3, \alpha_{17} = \alpha_2, \alpha_{18} = \alpha_1; \\ \beta_1 &= 0.11072655003739784175754797312279745, \\ \beta_2 &= 0.61101267825171523627962718607785428, \\ \beta_3 &= -0.19202809069032535396838334049379558, \\ \beta_4 &= -0.25979073929811660257162833544861286, \\ \beta_5 &= 0.38384564066882093754274499421236298, \\ \beta_6 &= 0.32661664886778120135972921761872954, \\ \beta_7 &= -0.53463443374897025678663398242742174, \\ \beta_8 &= -0.39935632081078281354806842349635698, \\ \beta_9 &= 1 - 2 * (\beta_1 + \beta_2 + \beta_3 + \beta_4 + \beta_5 + \beta_6 + \beta_7 + \beta_8), \\ \beta_{10} &= \beta_8, \beta_{11} = \beta_7, \beta_{12} = \beta_6, \beta_{13} = \beta_5, \beta_{14} = \beta_4, \beta_{15} = \beta_3, \beta_{16} = \beta_2, \\ \beta_{17} &= \beta_1, \text{Ref.}[12]\end{aligned}$$

**8A17c**  $\alpha_1 = 0.04463795052359022755913999625733590,$   
 $\alpha_2 = 0.21988440427147072254445535069606167,$   
 $\alpha_3 = 0.10250365693975069608261241007779814,$   
 $\alpha_4 = -0.00477482916916881658022489063962934,$   
 $\alpha_5 = -0.03886264282111817697737420875189743,$   
 $\alpha_6 = 0.18681583743297155471526153503972746,$   
 $\alpha_7 = -0.02405084735747361993573587982407554,$   
 $\alpha_8 = -0.05897433015592386914575323926766330,$   
 $\alpha_9 = 1/2 - (\alpha_1 + \alpha_2 + \alpha_3 + \alpha_4 + \alpha_5 + \alpha_6 + \alpha_7 + \alpha_8),$   
 $\alpha_{10} = \alpha_9, \alpha_{11} = \alpha_8, \alpha_{12} = \alpha_7, \alpha_{13} = \alpha_6, \alpha_{14} = \alpha_5, \alpha_{15} = \alpha_4,$   
 $\alpha_{16} = \alpha_3, \alpha_{17} = \alpha_2, \alpha_{18} = \alpha_1;$   
 $\beta_1 = 0.13593258071690959145543264213495574,$   
 $\beta_2 = 0.13024946780523828601621193778196846,$   
 $\beta_3 = 0.43234521869358547487983257884877035,$   
 $\beta_4 = -0.58253476904040845493112837930861212,$   
 $\beta_5 = 0.31548728537940479698273603797274199,$   
 $\beta_6 = 0.26500275499062083398346002963079872,$   
 $\beta_7 = -0.45040492499772251180922896712151891,$   
 $\beta_8 = -0.02168476171861335324934388684707580,$   
 $\beta_9 = 1 - 2 * (\beta_1 + \beta_2 + \beta_3 + \beta_4 + \beta_5 + \beta_6 + \beta_7 + \beta_8),$   
 $\beta_{10} = \beta_8, \beta_{11} = \beta_7, \beta_{12} = \beta_6, \beta_{13} = \beta_5, \beta_{14} = \beta_4, \beta_{15} = \beta_3, \beta_{16} = \beta_2,$   
 $\beta_{17} = \beta_1, \text{Ref.}[12]$

For more details about the meaning of the parameters in the following table, please see Ref.[14].

- 
- [1] H. Youshida, *Phys. Lett. A*, 1990, **150**, 262.  
[2] M. Suzuki, *Phys. Lett. A*, 1990, **146**, 319.  
[3] E. Hairer, G. Wanner and C. Lubich, *Geometric Numerical Integration*, Springer, The Netherlands, 2006.  
[4] W. Kahan and R.-C. Li, *Mathematics of Computation*, 1997, **66**, 1089.



|                           | H+H <sub>2</sub>                                                                                                                              | H+HN                                                                                                                                             | H+ <sup>32</sup> O <sub>2</sub>                                                                                                                      | F+HD                                                                                                                                                |
|---------------------------|-----------------------------------------------------------------------------------------------------------------------------------------------|--------------------------------------------------------------------------------------------------------------------------------------------------|------------------------------------------------------------------------------------------------------------------------------------------------------|-----------------------------------------------------------------------------------------------------------------------------------------------------|
| Grid/basis range and size | $R \in [0.1, 12.0]$ , $N_R^1=63$ , $N_R^2=49$<br>$r \in [0.4, 9.0]$ , $N_r^1=49$ , $N_r^2=23$<br>$j_{\min} = 0 \sim j_{\max} = 46$ , $N_j=24$ | $R \in [0.3, 16.0]$ , $N_R^1=143$ , $N_R^2=63$<br>$r \in [0.4, 13.5]$ , $N_r^1=127$ , $N_r^2=31$<br>$j_{\min} = 0 \sim j_{\max} = 46$ , $N_j=47$ | $R \in [0.015, 14.5]$ , $N_R^1=179$ , $N_R^2=119$<br>$r \in [0.7, 13.2]$ , $N_r^1=255$ , $N_r^2=49$<br>$j_{\min} = 0 \sim j_{\max} = 120$ , $N_j=61$ | $R \in [0.1, 38.0]$ , $N_R^1=399$ , $N_R^2=299$<br>$r \in [0.6, 36.0]$ , $N_r^1=269$ , $N_r^2=31$<br>$j_{\min} = 0 \sim j_{\max} = 260$ , $N_j=261$ |
| Initial wavepacket        | $R_0=8.0$<br>$\Delta_R=0.5$<br>$k_0 = \sqrt{2E_0\mu R}$ with $E_0=0.7\text{eV}$                                                               | $R_0=11.0$<br>$\Delta_R=0.3$<br>$k_0 = \sqrt{2E_0\mu R}$ with $E_0=0.5\text{eV}$                                                                 | $R_0=11.0$<br>$\Delta_R=0.5$<br>$k_0 = \sqrt{2E_0\mu R}$ with $E_0=0.7\text{eV}$                                                                     | $R_0=17.0$<br>$\Delta_R=1.0$<br>$k_0 = \sqrt{2E_0\mu R}$ with $E_0=0.035\text{eV}$                                                                  |
| Absorbing Potential       | $C' = 0.1$ , $n' = n = 2$ , $R_a = 9.5$<br>$C_a = 0.12$ , $C_b = 0.3$ , $r_a=6.7$ , $r_b=8.9$                                                 | $C' = 0.02$ , $n' = n = 1$ , $R_a = 12.0$<br>$C_a = 0.01$ , $C_b = 0.03$ , $r_a=10.5$ , $r_b=12.5$                                               | $C' = 0.012$ , $n' = n = 2$ , $R_a = 9.2$<br>$C_a = 0.003$ , $C_b = 0.04$ , $r_a=10.0$ , $r_b=12.2$                                                  | $C' = 0.0015$ , $n' = n = 1$ , $R_a = 22.0$<br>$C_a = 0.001$ , $C_b = 0.06$ , $r_a=16.0$ , $r_b=34.0$                                               |
| Total propagation time    | 10000a.u./ 1200 iterations                                                                                                                    | 150K a.u./ 70K iterations                                                                                                                        | 170K a.u./ 60K iterations                                                                                                                            | 300K a.u./ 150K iterations                                                                                                                          |
| Matching Plane            | $R'_0=5.5$                                                                                                                                    | $R'_0=10.0$                                                                                                                                      | $R'_0=10.0$                                                                                                                                          | $R'_0=13.2$                                                                                                                                         |

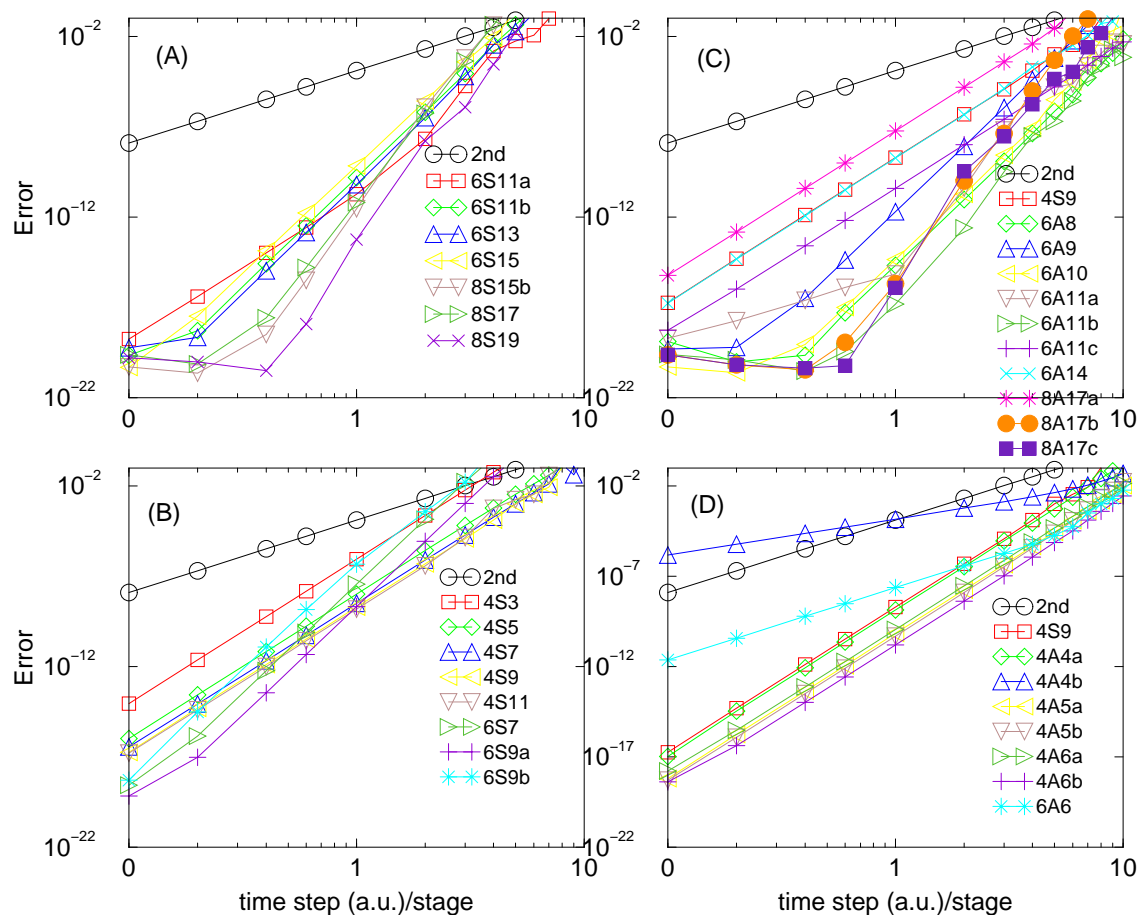

FIG. 1:  $\log_{10}(\text{error})$  vs  $\log_{10}(\text{effort-time step})$  associated with higher order operator splitting methods implemented in the VTV form on 1D Morse model.

- [5] R. I. McLachlan and R. G. W. Quispel, *Acta Numerica*, 2002, **11**, 341.
- [6] M. Sofroniou and G. Spaletta, *Optim. Methods Software*, 2005, **20**, 597.
- [7] A. D. Bandrauk and H. Shen, *J. Phys. A: Math. Gen.*, 1994, **27**, 7147.
- [8] R. I. McLachlan, *SIAM J. Sci. Comput.*, 1995, **16**, 151.
- [9] R. I. McLachlan, *Numer. Math*, 1994, **66**, 465.
- [10] R. I. McLachlan, *BIT Numerical Mathematics*, 1994, **35**, 258.
- [11] S. Blanes and P. C. Moan, *J. Comput. Appl. Math.*, 2002, **142**, 313.
- [12] C. Schlier and A. Seiter, *Comp. Phys. Comm.*, 2000, **130**, 176.
- [13] T. Monovasillis and T. E. Simos, *Comput. Mater. Science*, 2007, **38**, 526.
- [14] Z. Sun, S. Y. Lee, H. Guo and D. H. Zhang, *J. Chem. Phys.*, 2009, **130**, 174102.

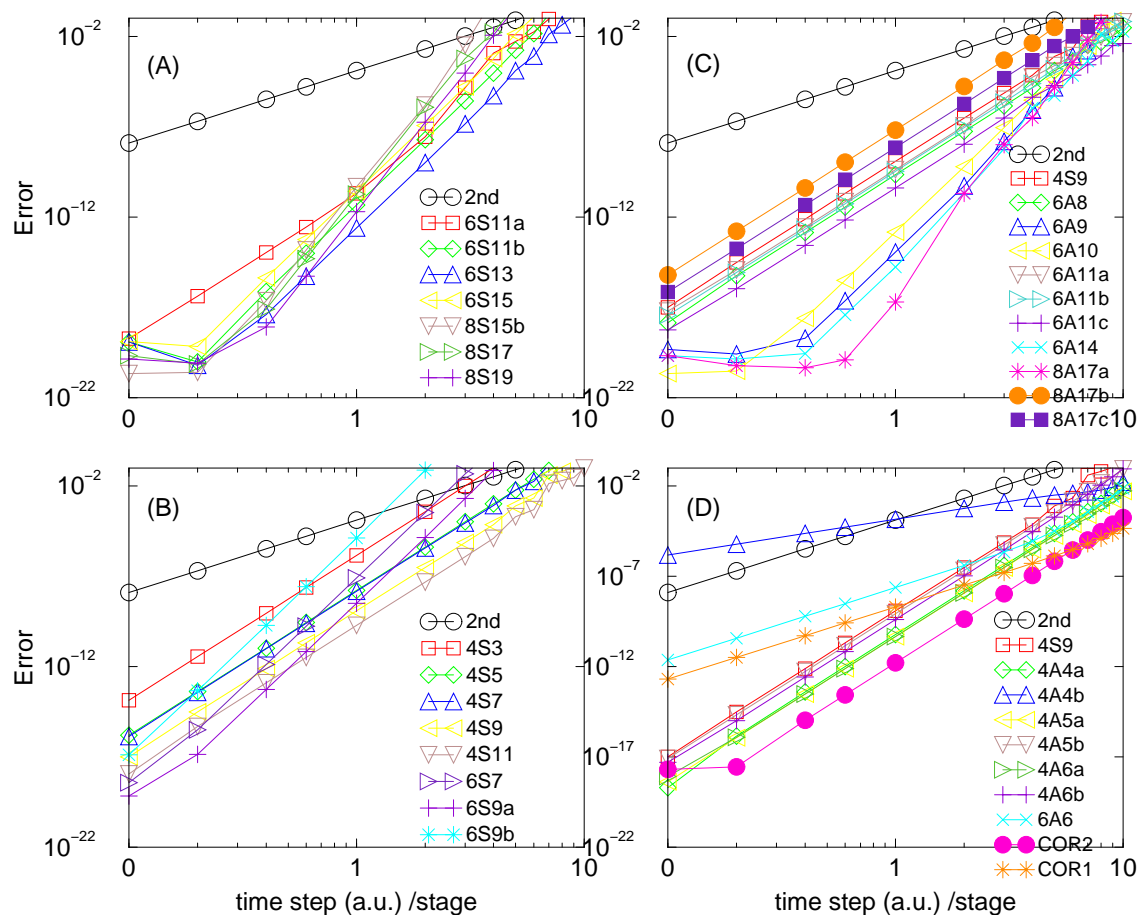

FIG. 2:  $\log_{10}(\text{error})$  vs  $\log_{10}(\text{effort-time step})$  associated with higher order operator splitting methods implemented in the TVT form on 1D Morse model. In this TVT form implementation, the accuracy of the 4A4a, 4S9, 6S9b, 6S15, 6A9, 6S11a, 6S11b and 8A17a propagators increases but the accuracy of the 4A6b, 6S13, 6A8, 6A11a, 6A10, 6A11b and 8S19 propagators decrease, comparing with that of those in the VTV form implementation.
